# Supplementary material for: Genetic effect of thyroid function-related diseases on acute respiratory distress syndrome: a Mendelian randomization study
Source: Aging (Albany NY). 2024 Jul 1;16(17):12209–24. doi: 10.18632/aging.205996 (PMC11424573; doi:10.18632/aging.205996)
Supplement: Supplementary Table 1 [file aging-16-205996-s001.xls]

## Sheet: finn-b-E4_THYROID
Supplementary Table 1. Totally 40 and 50 SNPs of DTG and hypothyroidism were acquired as IVs for UVMR analysis.
SNP	effect_allele.exposure	other_allele.exposure	effect_allele.outcome	other_allele.outcome	beta.exposure	beta.outcome	eaf.exposure	eaf.outcome	remove	palindromic	ambiguous	id.outcome	chr	pos	se.outcome	samplesize.outcome	pval.outcome	outcome	originalname.outcome	outcome.deprecated	mr_keep.outcome	data_source.outcome	chr.exposure	pos.exposure	se.exposure	pval.exposure	samplesize.exposure		exposure	mr_keep.exposure	pval_origin.exposure	data_source.exposure	action	mr_keep
rs10116520	G	A	G	A	0.0814	0.1797	0.4011	0.401	FALSE	FALSE	FALSE	finn-b-J10_ARDS	9	127029630	0.1126		0.1105	Adult respiratory distress syndrome || id:finn-b-J10_ARDS	Adult respiratory distress syndrome	Adult respiratory distress syndrome || ||	TRUE	igd	9	127029630	0.0101	8.9929e-16		finn-b-E4_THYROID	Disorders of the thyroid gland || id:finn-b-E4_THYROID	TRUE	reported	igd	2	TRUE
rs10118880	A	G	A	G	-0.0666	0.0125	0.7238	0.7238	FALSE	FALSE	FALSE	finn-b-J10_ARDS	9	21559961	0.1232		0.9194	Adult respiratory distress syndrome || id:finn-b-J10_ARDS	Adult respiratory distress syndrome	Adult respiratory distress syndrome || ||	TRUE	igd	9	21559961	0.0111	1.95799e-09		finn-b-E4_THYROID	Disorders of the thyroid gland || id:finn-b-E4_THYROID	TRUE	reported	igd	2	TRUE
rs10223666	C	G	C	G	0.07	0.0299	0.6803	0.6803	FALSE	TRUE	FALSE	finn-b-J10_ARDS	6	43805502	0.1193		0.802	Adult respiratory distress syndrome || id:finn-b-J10_ARDS	Adult respiratory distress syndrome	Adult respiratory distress syndrome || ||	TRUE	igd	6	43805502	0.0107	7.17629e-11		finn-b-E4_THYROID	Disorders of the thyroid gland || id:finn-b-E4_THYROID	TRUE	reported	igd	2	TRUE
rs10905668	T	C	T	C	0.0684	0.0623	0.2854	0.2855	FALSE	FALSE	FALSE	finn-b-J10_ARDS	10	6092055	0.1224		0.6108	Adult respiratory distress syndrome || id:finn-b-J10_ARDS	Adult respiratory distress syndrome	Adult respiratory distress syndrome || ||	TRUE	igd	10	6092055	0.011	5.18896e-10		finn-b-E4_THYROID	Disorders of the thyroid gland || id:finn-b-E4_THYROID	TRUE	reported	igd	2	TRUE
rs11211645	G	A	G	A	0.0687	0.1162	0.4168	0.4168	FALSE	FALSE	FALSE	finn-b-J10_ARDS	2	1412581	0.1126		0.3022	Adult respiratory distress syndrome || id:finn-b-J10_ARDS	Adult respiratory distress syndrome	Adult respiratory distress syndrome || ||	TRUE	igd	2	1412581	0.0101	1.08793e-11		finn-b-E4_THYROID	Disorders of the thyroid gland || id:finn-b-E4_THYROID	TRUE	reported	igd	2	TRUE
rs11571297	C	T	C	T	-0.1019	-0.0825	0.3711	0.3711	FALSE	FALSE	FALSE	finn-b-J10_ARDS	2	204745003	0.1141		0.4695	Adult respiratory distress syndrome || id:finn-b-J10_ARDS	Adult respiratory distress syndrome	Adult respiratory distress syndrome || ||	TRUE	igd	2	204745003	0.0103	3.45382e-23		finn-b-E4_THYROID	Disorders of the thyroid gland || id:finn-b-E4_THYROID	TRUE	reported	igd	2	TRUE
rs12195728	G	A	G	A	0.0907	0.2982	0.1491	0.1493	FALSE	FALSE	FALSE	finn-b-J10_ARDS	6	109278873	0.1558		0.0555303	Adult respiratory distress syndrome || id:finn-b-J10_ARDS	Adult respiratory distress syndrome	Adult respiratory distress syndrome || ||	TRUE	igd	6	109278873	0.0139	7.57356e-11		finn-b-E4_THYROID	Disorders of the thyroid gland || id:finn-b-E4_THYROID	TRUE	reported	igd	2	TRUE
rs12348448	G	A	G	A	-0.0584	0.0307	0.3674	0.3672	FALSE	FALSE	FALSE	finn-b-J10_ARDS	9	5525775	0.1174		0.7935	Adult respiratory distress syndrome || id:finn-b-J10_ARDS	Adult respiratory distress syndrome	Adult respiratory distress syndrome || ||	TRUE	igd	9	5525775	0.0106	3.22901e-08		finn-b-E4_THYROID	Disorders of the thyroid gland || id:finn-b-E4_THYROID	TRUE	reported	igd	2	TRUE
rs1534430	T	C	T	C	-0.0601	0.1367	0.4172	0.4173	FALSE	FALSE	FALSE	finn-b-J10_ARDS	2	12644736	0.1117		0.221	Adult respiratory distress syndrome || id:finn-b-J10_ARDS	Adult respiratory distress syndrome	Adult respiratory distress syndrome || ||	TRUE	igd	2	12644736	0.0101	2.40198e-09		finn-b-E4_THYROID	Disorders of the thyroid gland || id:finn-b-E4_THYROID	TRUE	reported	igd	2	TRUE
rs167479	T	G	T	G	0.0565	0.1026	0.4249	0.4249	FALSE	FALSE	FALSE	finn-b-J10_ARDS	19	11526765	0.1126		0.3619	Adult respiratory distress syndrome || id:finn-b-J10_ARDS	Adult respiratory distress syndrome	Adult respiratory distress syndrome || ||	TRUE	igd	19	11526765	0.0101	2.01002e-08		finn-b-E4_THYROID	Disorders of the thyroid gland || id:finn-b-E4_THYROID	TRUE	reported	igd	2	TRUE
rs17008423	T	C	T	C	-0.107	0.1008	0.1229	0.1228	FALSE	FALSE	FALSE	finn-b-J10_ARDS	4	149624705	0.1699		0.552901	Adult respiratory distress syndrome || id:finn-b-J10_ARDS	Adult respiratory distress syndrome	Adult respiratory distress syndrome || ||	TRUE	igd	4	149624705	0.0153	2.95189e-12		finn-b-E4_THYROID	Disorders of the thyroid gland || id:finn-b-E4_THYROID	TRUE	reported	igd	2	TRUE
rs1797071	C	T	C	T	-0.0586	-0.1338	0.3741	0.3742	FALSE	FALSE	FALSE	finn-b-J10_ARDS	1	218581509	0.1146		0.2428	Adult respiratory distress syndrome || id:finn-b-J10_ARDS	Adult respiratory distress syndrome	Adult respiratory distress syndrome || ||	TRUE	igd	1	218581509	0.0103	1.22e-08		finn-b-E4_THYROID	Disorders of the thyroid gland || id:finn-b-E4_THYROID	TRUE	reported	igd	2	TRUE
rs1934804	G	A	G	A	0.0711	0.0402	0.3689	0.3688	FALSE	FALSE	FALSE	finn-b-J10_ARDS	6	148511237	0.1151		0.726901	Adult respiratory distress syndrome || id:finn-b-J10_ARDS	Adult respiratory distress syndrome	Adult respiratory distress syndrome || ||	TRUE	igd	6	148511237	0.0103	5.5847e-12		finn-b-E4_THYROID	Disorders of the thyroid gland || id:finn-b-E4_THYROID	TRUE	reported	igd	2	TRUE
rs1990760	T	C	T	C	0.0646	0.128	0.5849	0.5848	FALSE	FALSE	FALSE	finn-b-J10_ARDS	2	163124051	0.1119		0.2528	Adult respiratory distress syndrome || id:finn-b-J10_ARDS	Adult respiratory distress syndrome	Adult respiratory distress syndrome || ||	TRUE	igd	2	163124051	0.0101	1.37401e-10		finn-b-E4_THYROID	Disorders of the thyroid gland || id:finn-b-E4_THYROID	TRUE	reported	igd	2	TRUE
rs201121732	CT	C	CT	C	0.1213	-0.1637	0.05901	0.05897	FALSE	FALSE	FALSE	finn-b-J10_ARDS	16	27395662	0.2382		0.492	Adult respiratory distress syndrome || id:finn-b-J10_ARDS	Adult respiratory distress syndrome	Adult respiratory distress syndrome || ||	TRUE	igd	16	27395662	0.0211	8.95592e-09		finn-b-E4_THYROID	Disorders of the thyroid gland || id:finn-b-E4_THYROID	TRUE	reported	igd	2	TRUE
rs2110451	A	G	A	G	0.0703	-0.0937	0.2776	0.2776	FALSE	FALSE	FALSE	finn-b-J10_ARDS	12	9931347	0.1227		0.4452	Adult respiratory distress syndrome || id:finn-b-J10_ARDS	Adult respiratory distress syndrome	Adult respiratory distress syndrome || ||	TRUE	igd	12	9931347	0.0111	2.24001e-10		finn-b-E4_THYROID	Disorders of the thyroid gland || id:finn-b-E4_THYROID	TRUE	reported	igd	2	TRUE
rs2271194	T	A	T	A	-0.0563	0.0364	0.5922	0.592	FALSE	TRUE	FALSE	finn-b-J10_ARDS	12	56477694	0.1124		0.746401	Adult respiratory distress syndrome || id:finn-b-J10_ARDS	Adult respiratory distress syndrome	Adult respiratory distress syndrome || ||	TRUE	igd	12	56477694	0.0101	2.50501e-08		finn-b-E4_THYROID	Disorders of the thyroid gland || id:finn-b-E4_THYROID	TRUE	reported	igd	2	TRUE
rs2445612	C	T	C	T	-0.0621	-0.0263	0.3961	0.3961	FALSE	FALSE	FALSE	finn-b-J10_ARDS	8	128197856	0.1135		0.8167	Adult respiratory distress syndrome || id:finn-b-J10_ARDS	Adult respiratory distress syndrome	Adult respiratory distress syndrome || ||	TRUE	igd	8	128197856	0.0102	1.16001e-09		finn-b-E4_THYROID	Disorders of the thyroid gland || id:finn-b-E4_THYROID	TRUE	reported	igd	2	TRUE
rs244686	C	T	C	T	-0.0662	0.0508	0.7486	0.7487	FALSE	FALSE	FALSE	finn-b-J10_ARDS	5	133423794	0.1275		0.6902	Adult respiratory distress syndrome || id:finn-b-J10_ARDS	Adult respiratory distress syndrome	Adult respiratory distress syndrome || ||	TRUE	igd	5	133423794	0.0114	6.69607e-09		finn-b-E4_THYROID	Disorders of the thyroid gland || id:finn-b-E4_THYROID	TRUE	reported	igd	2	TRUE
rs2844542	G	C	G	C	0.106	0.0695	0.339	0.339	FALSE	TRUE	FALSE	finn-b-J10_ARDS	6	31347274	0.1199		0.5619	Adult respiratory distress syndrome || id:finn-b-J10_ARDS	Adult respiratory distress syndrome	Adult respiratory distress syndrome || ||	TRUE	igd	6	31347274	0.0109	1.59001e-22		finn-b-E4_THYROID	Disorders of the thyroid gland || id:finn-b-E4_THYROID	TRUE	reported	igd	2	TRUE
rs2858483	C	A	C	A	0.0719	-0.0724	0.3991	0.3989	FALSE	FALSE	FALSE	finn-b-J10_ARDS	22	37586672	0.1127		0.5206	Adult respiratory distress syndrome || id:finn-b-J10_ARDS	Adult respiratory distress syndrome	Adult respiratory distress syndrome || ||	TRUE	igd	22	37586672	0.0101	1.22603e-12		finn-b-E4_THYROID	Disorders of the thyroid gland || id:finn-b-E4_THYROID	TRUE	reported	igd	2	TRUE
rs2983511	C	G	C	G	-0.073	0.0405	0.2628	0.2629	FALSE	TRUE	FALSE	finn-b-J10_ARDS	6	166043959	0.125		0.7461	Adult respiratory distress syndrome || id:finn-b-J10_ARDS	Adult respiratory distress syndrome	Adult respiratory distress syndrome || ||	TRUE	igd	6	166043959	0.0113	8.84301e-11		finn-b-E4_THYROID	Disorders of the thyroid gland || id:finn-b-E4_THYROID	TRUE	reported	igd	2	TRUE
rs4274624	T	C	T	C	-0.0962	-0.2336	0.7689	0.769	FALSE	FALSE	FALSE	finn-b-J10_ARDS	2	191958656	0.1305		0.0735005	Adult respiratory distress syndrome || id:finn-b-J10_ARDS	Adult respiratory distress syndrome	Adult respiratory distress syndrome || ||	TRUE	igd	2	191958656	0.0118	3.34118e-16		finn-b-E4_THYROID	Disorders of the thyroid gland || id:finn-b-E4_THYROID	TRUE	reported	igd	2	TRUE
rs4409785	C	T	C	T	0.0733	0.0212	0.1668	0.1668	FALSE	FALSE	FALSE	finn-b-J10_ARDS	11	95311422	0.1476		0.8856	Adult respiratory distress syndrome || id:finn-b-J10_ARDS	Adult respiratory distress syndrome	Adult respiratory distress syndrome || ||	TRUE	igd	11	95311422	0.0133	3.45096e-08		finn-b-E4_THYROID	Disorders of the thyroid gland || id:finn-b-E4_THYROID	TRUE	reported	igd	2	TRUE
rs61759532	T	C	T	C	0.0743	-0.0905	0.1898	0.1898	FALSE	FALSE	FALSE	finn-b-J10_ARDS	17	7240391	0.1421		0.5242	Adult respiratory distress syndrome || id:finn-b-J10_ARDS	Adult respiratory distress syndrome	Adult respiratory distress syndrome || ||	TRUE	igd	17	7240391	0.0127	4.85803e-09		finn-b-E4_THYROID	Disorders of the thyroid gland || id:finn-b-E4_THYROID	TRUE	reported	igd	2	TRUE
rs62073975	A	G	A	G	-0.1192	-0.0669	0.06616	0.06618	FALSE	FALSE	FALSE	finn-b-J10_ARDS	17	45622690	0.2209		0.7621	Adult respiratory distress syndrome || id:finn-b-J10_ARDS	Adult respiratory distress syndrome	Adult respiratory distress syndrome || ||	TRUE	igd	17	45622690	0.0201	3.21004e-09		finn-b-E4_THYROID	Disorders of the thyroid gland || id:finn-b-E4_THYROID	TRUE	reported	igd	2	TRUE
rs6679677	A	C	A	C	0.278	0.1137	0.1472	0.1472	FALSE	FALSE	FALSE	finn-b-J10_ARDS	1	114303808	0.1562		0.4668	Adult respiratory distress syndrome || id:finn-b-J10_ARDS	Adult respiratory distress syndrome	Adult respiratory distress syndrome || ||	TRUE	igd	1	114303808	0.0141	2.1712e-86		finn-b-E4_THYROID	Disorders of the thyroid gland || id:finn-b-E4_THYROID	TRUE	reported	igd	2	TRUE
rs7028661	G	A	G	A	0.2199	0.0731	0.6535	0.6536	FALSE	FALSE	FALSE	finn-b-J10_ARDS	9	100538470	0.1159		0.5283	Adult respiratory distress syndrome || id:finn-b-J10_ARDS	Adult respiratory distress syndrome	Adult respiratory distress syndrome || ||	TRUE	igd	9	100538470	0.0105	1.2659e-97		finn-b-E4_THYROID	Disorders of the thyroid gland || id:finn-b-E4_THYROID	TRUE	reported	igd	2	TRUE
rs7043516	C	A	C	A	-0.0966	-0.0996	0.1679	0.1679	FALSE	FALSE	FALSE	finn-b-J10_ARDS	9	100617433	0.1485		0.5025	Adult respiratory distress syndrome || id:finn-b-J10_ARDS	Adult respiratory distress syndrome	Adult respiratory distress syndrome || ||	TRUE	igd	9	100617433	0.0134	5.58727e-13		finn-b-E4_THYROID	Disorders of the thyroid gland || id:finn-b-E4_THYROID	TRUE	reported	igd	2	TRUE
rs7148630	T	C	T	C	-0.0924	-0.1266	0.8922	0.8923	FALSE	FALSE	FALSE	finn-b-J10_ARDS	14	81484459	0.178		0.4768	Adult respiratory distress syndrome || id:finn-b-J10_ARDS	Adult respiratory distress syndrome	Adult respiratory distress syndrome || ||	TRUE	igd	14	81484459	0.016	7.97407e-09		finn-b-E4_THYROID	Disorders of the thyroid gland || id:finn-b-E4_THYROID	TRUE	reported	igd	2	TRUE
rs72502580	T	A	T	A	-0.1519	-0.094	0.1039	0.1039	FALSE	TRUE	FALSE	finn-b-J10_ARDS	6	31364848	0.183		0.6073	Adult respiratory distress syndrome || id:finn-b-J10_ARDS	Adult respiratory distress syndrome	Adult respiratory distress syndrome || ||	TRUE	igd	6	31364848	0.0165	2.66073e-20		finn-b-E4_THYROID	Disorders of the thyroid gland || id:finn-b-E4_THYROID	TRUE	reported	igd	2	TRUE
rs7310615	G	C	G	C	-0.1141	0.0882	0.5863	0.5865	FALSE	TRUE	FALSE	finn-b-J10_ARDS	12	111865049	0.1118		0.4301	Adult respiratory distress syndrome || id:finn-b-J10_ARDS	Adult respiratory distress syndrome	Adult respiratory distress syndrome || ||	TRUE	igd	12	111865049	0.0101	9.20874e-30		finn-b-E4_THYROID	Disorders of the thyroid gland || id:finn-b-E4_THYROID	TRUE	reported	igd	2	TRUE
rs73192661	T	C	T	C	-0.0944	-0.0556	0.3837	0.3836	FALSE	FALSE	FALSE	finn-b-J10_ARDS	3	188128794	0.1137		0.6248	Adult respiratory distress syndrome || id:finn-b-J10_ARDS	Adult respiratory distress syndrome	Adult respiratory distress syndrome || ||	TRUE	igd	3	188128794	0.0102	2.67178e-20		finn-b-E4_THYROID	Disorders of the thyroid gland || id:finn-b-E4_THYROID	TRUE	reported	igd	2	TRUE
rs7320607	A	G	A	G	0.0677	0.0685	0.2947	0.2945	FALSE	FALSE	FALSE	finn-b-J10_ARDS	13	24785637	0.1213		0.5723	Adult respiratory distress syndrome || id:finn-b-J10_ARDS	Adult respiratory distress syndrome	Adult respiratory distress syndrome || ||	TRUE	igd	13	24785637	0.0109	4.75598e-10		finn-b-E4_THYROID	Disorders of the thyroid gland || id:finn-b-E4_THYROID	TRUE	reported	igd	2	TRUE
rs78765971	G	GAC	G	GAC	0.1761	-0.0801	0.114	0.1141	FALSE	FALSE	FALSE	finn-b-J10_ARDS	1	108362169	0.1734		0.6442	Adult respiratory distress syndrome || id:finn-b-J10_ARDS	Adult respiratory distress syndrome	Adult respiratory distress syndrome || ||	TRUE	igd	1	108362169	0.0157	3.40408e-29		finn-b-E4_THYROID	Disorders of the thyroid gland || id:finn-b-E4_THYROID	TRUE	reported	igd	2	TRUE
rs7902146	T	C	T	C	-0.0672	-0.1521	0.7503	0.7503	FALSE	FALSE	FALSE	finn-b-J10_ARDS	10	63801030	0.1273		0.2324	Adult respiratory distress syndrome || id:finn-b-J10_ARDS	Adult respiratory distress syndrome	Adult respiratory distress syndrome || ||	TRUE	igd	10	63801030	0.0115	4.46797e-09		finn-b-E4_THYROID	Disorders of the thyroid gland || id:finn-b-E4_THYROID	TRUE	reported	igd	2	TRUE
rs9271365	G	T	G	T	0.1845	0.0574	0.3675	0.3675	FALSE	FALSE	FALSE	finn-b-J10_ARDS	6	32586794	0.12		0.6323	Adult respiratory distress syndrome || id:finn-b-J10_ARDS	Adult respiratory distress syndrome	Adult respiratory distress syndrome || ||	TRUE	igd	6	32586794	0.0109	7.71969e-64		finn-b-E4_THYROID	Disorders of the thyroid gland || id:finn-b-E4_THYROID	TRUE	reported	igd	2	TRUE
rs9277552	T	C	T	C	-0.0822	-0.0646	0.165	0.165	FALSE	FALSE	FALSE	finn-b-J10_ARDS	6	33055501	0.1481		0.662799	Adult respiratory distress syndrome || id:finn-b-J10_ARDS	Adult respiratory distress syndrome	Adult respiratory distress syndrome || ||	TRUE	igd	6	33055501	0.0134	9.27001e-10		finn-b-E4_THYROID	Disorders of the thyroid gland || id:finn-b-E4_THYROID	TRUE	reported	igd	2	TRUE
rs9279765	A	AC	A	AC	0.1621	0.2037	0.1725	0.1725	FALSE	FALSE	FALSE	finn-b-J10_ARDS	6	32561019	0.1537		0.1852	Adult respiratory distress syndrome || id:finn-b-J10_ARDS	Adult respiratory distress syndrome	Adult respiratory distress syndrome || ||	TRUE	igd	6	32561019	0.014	8.1358e-31		finn-b-E4_THYROID	Disorders of the thyroid gland || id:finn-b-E4_THYROID	TRUE	reported	igd	2	TRUE
rs9687206	G	A	G	A	0.0987	0.2672	0.4672	0.4674	FALSE	FALSE	FALSE	finn-b-J10_ARDS	5	76515824	0.1111		0.0161801	Adult respiratory distress syndrome || id:finn-b-J10_ARDS	Adult respiratory distress syndrome	Adult respiratory distress syndrome || ||	TRUE	igd	5	76515824	0.01	3.65932e-23		finn-b-E4_THYROID	Disorders of the thyroid gland || id:finn-b-E4_THYROID	TRUE	reported	igd	2	TRUE
SNPs associated with DTG and hypothyroidism for UVMR analysis

## Sheet: finn-b-E4_HYTHYNAS
SNP	effect_allele.exposure	other_allele.exposure	effect_allele.outcome	other_allele.outcome	beta.exposure	beta.outcome	eaf.exposure	eaf.outcome	remove	palindromic	ambiguous	id.outcome	chr	pos	se.outcome	samplesize.outcome	pval.outcome	outcome	originalname.outcome	outcome.deprecated	mr_keep.outcome	data_source.outcome	samplesize.exposure	chr.exposure	pos.exposure	se.exposure	pval.exposure	id.exposure	exposure	mr_keep.exposure	pval_origin.exposure	data_source.exposure	action	mr_keep
rs10118880	A	G	A	G	-0.0702	0.0125	0.724	0.7238	FALSE	FALSE	FALSE	finn-b-J10_ARDS	9	21559961	0.1232		0.9194	Adult respiratory distress syndrome || id:finn-b-J10_ARDS	Adult respiratory distress syndrome	Adult respiratory distress syndrome || ||	TRUE	igd		9	21559961	0.012	5.34995e-09	finn-b-E4_HYTHYNAS	Hypothyroidism, other/unspecified || id:finn-b-E4_HYTHYNAS	TRUE	reported	igd	2	TRUE
rs10425559	G	A	G	A	-0.0633	0.0104	0.5994	0.5996	FALSE	FALSE	FALSE	finn-b-J10_ARDS	19	4837487	0.1131		0.9266	Adult respiratory distress syndrome || id:finn-b-J10_ARDS	Adult respiratory distress syndrome	Adult respiratory distress syndrome || ||	TRUE	igd		19	4837487	0.011	9.36095e-09	finn-b-E4_HYTHYNAS	Hypothyroidism, other/unspecified || id:finn-b-E4_HYTHYNAS	TRUE	reported	igd	2	TRUE
rs10905668	T	C	T	C	0.0775	0.0623	0.2855	0.2855	FALSE	FALSE	FALSE	finn-b-J10_ARDS	10	6092055	0.1224		0.6108	Adult respiratory distress syndrome || id:finn-b-J10_ARDS	Adult respiratory distress syndrome	Adult respiratory distress syndrome || ||	TRUE	igd		10	6092055	0.0119	8.31381e-11	finn-b-E4_HYTHYNAS	Hypothyroidism, other/unspecified || id:finn-b-E4_HYTHYNAS	TRUE	reported	igd	2	TRUE
rs11153158	C	T	C	T	0.0922	0.2888	0.142	0.1423	FALSE	FALSE	FALSE	finn-b-J10_ARDS	6	109376118	0.1588		0.0689208	Adult respiratory distress syndrome || id:finn-b-J10_ARDS	Adult respiratory distress syndrome	Adult respiratory distress syndrome || ||	TRUE	igd		6	109376118	0.0154	2.175e-09	finn-b-E4_HYTHYNAS	Hypothyroidism, other/unspecified || id:finn-b-E4_HYTHYNAS	TRUE	reported	igd	2	TRUE
rs11211645	G	A	G	A	0.0931	0.1162	0.4172	0.4168	FALSE	FALSE	FALSE	finn-b-J10_ARDS	2	1412581	0.1126		0.3022	Adult respiratory distress syndrome || id:finn-b-J10_ARDS	Adult respiratory distress syndrome	Adult respiratory distress syndrome || ||	TRUE	igd		2	1412581	0.0109	1.80094e-17	finn-b-E4_HYTHYNAS	Hypothyroidism, other/unspecified || id:finn-b-E4_HYTHYNAS	TRUE	reported	igd	2	TRUE
rs11571297	C	T	C	T	-0.1162	-0.0825	0.3711	0.3711	FALSE	FALSE	FALSE	finn-b-J10_ARDS	2	204745003	0.1141		0.4695	Adult respiratory distress syndrome || id:finn-b-J10_ARDS	Adult respiratory distress syndrome	Adult respiratory distress syndrome || ||	TRUE	igd		2	204745003	0.0111	1.7398e-25	finn-b-E4_HYTHYNAS	Hypothyroidism, other/unspecified || id:finn-b-E4_HYTHYNAS	TRUE	reported	igd	2	TRUE
rs11662485	A	G	A	G	0.1162	-0.2262	0.08092	0.08099	FALSE	FALSE	FALSE	finn-b-J10_ARDS	18	77276417	0.2029		0.2649	Adult respiratory distress syndrome || id:finn-b-J10_ARDS	Adult respiratory distress syndrome	Adult respiratory distress syndrome || ||	TRUE	igd		18	77276417	0.0197	3.75803e-09	finn-b-E4_HYTHYNAS	Hypothyroidism, other/unspecified || id:finn-b-E4_HYTHYNAS	TRUE	reported	igd	2	TRUE
rs1203941	C	T	C	T	0.0912	0.004	0.7924	0.7918	FALSE	FALSE	FALSE	finn-b-J10_ARDS	20	22596589	0.1364		0.9766	Adult respiratory distress syndrome || id:finn-b-J10_ARDS	Adult respiratory distress syndrome	Adult respiratory distress syndrome || ||	TRUE	igd		20	22596589	0.0133	7.48514e-12	finn-b-E4_HYTHYNAS	Hypothyroidism, other/unspecified || id:finn-b-E4_HYTHYNAS	TRUE	reported	igd	2	TRUE
rs12089835	T	C	T	C	0.0682	-0.0432	0.3169	0.3161	FALSE	FALSE	FALSE	finn-b-J10_ARDS	1	19771438	0.1183		0.7151	Adult respiratory distress syndrome || id:finn-b-J10_ARDS	Adult respiratory distress syndrome	Adult respiratory distress syndrome || ||	TRUE	igd		1	19771438	0.0116	3.93097e-09	finn-b-E4_HYTHYNAS	Hypothyroidism, other/unspecified || id:finn-b-E4_HYTHYNAS	TRUE	reported	igd	2	TRUE
rs12922725	G	A	G	A	-0.0716	0.1235	0.7272	0.7273	FALSE	FALSE	FALSE	finn-b-J10_ARDS	16	85671713	0.1259		0.3268	Adult respiratory distress syndrome || id:finn-b-J10_ARDS	Adult respiratory distress syndrome	Adult respiratory distress syndrome || ||	TRUE	igd		16	85671713	0.0123	5.70506e-09	finn-b-E4_HYTHYNAS	Hypothyroidism, other/unspecified || id:finn-b-E4_HYTHYNAS	TRUE	reported	igd	2	TRUE
rs13289602	C	G	C	G	0.1028	-0.0532	0.1199	0.1198	FALSE	TRUE	FALSE	finn-b-J10_ARDS	9	4207974	0.1699		0.754401	Adult respiratory distress syndrome || id:finn-b-J10_ARDS	Adult respiratory distress syndrome	Adult respiratory distress syndrome || ||	TRUE	igd		9	4207974	0.0165	5.02597e-10	finn-b-E4_HYTHYNAS	Hypothyroidism, other/unspecified || id:finn-b-E4_HYTHYNAS	TRUE	reported	igd	2	TRUE
rs1534430	T	C	T	C	-0.0642	0.1367	0.4173	0.4173	FALSE	FALSE	FALSE	finn-b-J10_ARDS	2	12644736	0.1117		0.221	Adult respiratory distress syndrome || id:finn-b-J10_ARDS	Adult respiratory distress syndrome	Adult respiratory distress syndrome || ||	TRUE	igd		2	12644736	0.0109	4.13704e-09	finn-b-E4_HYTHYNAS	Hypothyroidism, other/unspecified || id:finn-b-E4_HYTHYNAS	TRUE	reported	igd	2	TRUE
rs1683253	C	T	C	T	0.0597	-0.095	0.5565	0.5564	FALSE	FALSE	FALSE	finn-b-J10_ARDS	1	114638577	0.1115		0.3941	Adult respiratory distress syndrome || id:finn-b-J10_ARDS	Adult respiratory distress syndrome	Adult respiratory distress syndrome || ||	TRUE	igd		1	114638577	0.0108	3.64301e-08	finn-b-E4_HYTHYNAS	Hypothyroidism, other/unspecified || id:finn-b-E4_HYTHYNAS	TRUE	reported	igd	2	TRUE
rs17008423	T	C	T	C	-0.13	0.1008	0.1228	0.1228	FALSE	FALSE	FALSE	finn-b-J10_ARDS	4	149624705	0.1699		0.552901	Adult respiratory distress syndrome || id:finn-b-J10_ARDS	Adult respiratory distress syndrome	Adult respiratory distress syndrome || ||	TRUE	igd		4	149624705	0.0167	6.19156e-15	finn-b-E4_HYTHYNAS	Hypothyroidism, other/unspecified || id:finn-b-E4_HYTHYNAS	TRUE	reported	igd	2	TRUE
rs17773965	T	C	T	C	-0.0823	-0.0047	0.2471	0.2476	FALSE	FALSE	FALSE	finn-b-J10_ARDS	2	217631338	0.1284		0.9706	Adult respiratory distress syndrome || id:finn-b-J10_ARDS	Adult respiratory distress syndrome	Adult respiratory distress syndrome || ||	TRUE	igd		2	217631338	0.0125	5.17607e-11	finn-b-E4_HYTHYNAS	Hypothyroidism, other/unspecified || id:finn-b-E4_HYTHYNAS	TRUE	reported	igd	2	TRUE
rs1934804	G	A	G	A	0.0744	0.0402	0.3686	0.3688	FALSE	FALSE	FALSE	finn-b-J10_ARDS	6	148511237	0.1151		0.726901	Adult respiratory distress syndrome || id:finn-b-J10_ARDS	Adult respiratory distress syndrome	Adult respiratory distress syndrome || ||	TRUE	igd		6	148511237	0.0112	2.93089e-11	finn-b-E4_HYTHYNAS	Hypothyroidism, other/unspecified || id:finn-b-E4_HYTHYNAS	TRUE	reported	igd	2	TRUE
rs1990760	T	C	T	C	0.0768	0.128	0.5849	0.5848	FALSE	FALSE	FALSE	finn-b-J10_ARDS	2	163124051	0.1119		0.2528	Adult respiratory distress syndrome || id:finn-b-J10_ARDS	Adult respiratory distress syndrome	Adult respiratory distress syndrome || ||	TRUE	igd		2	163124051	0.0109	2.063e-12	finn-b-E4_HYTHYNAS	Hypothyroidism, other/unspecified || id:finn-b-E4_HYTHYNAS	TRUE	reported	igd	2	TRUE
rs1993945	T	A	T	A	0.136	0.2311	0.4091	0.4087	FALSE	TRUE	FALSE	finn-b-J10_ARDS	5	76518195	0.1122		0.0394903	Adult respiratory distress syndrome || id:finn-b-J10_ARDS	Adult respiratory distress syndrome	Adult respiratory distress syndrome || ||	TRUE	igd		5	76518195	0.0109	1.293e-35	finn-b-E4_HYTHYNAS	Hypothyroidism, other/unspecified || id:finn-b-E4_HYTHYNAS	TRUE	reported	igd	2	TRUE
rs201121732	CT	C	CT	C	0.1312	-0.1637	0.05895	0.05897	FALSE	FALSE	FALSE	finn-b-J10_ARDS	16	27395662	0.2382		0.492	Adult respiratory distress syndrome || id:finn-b-J10_ARDS	Adult respiratory distress syndrome	Adult respiratory distress syndrome || ||	TRUE	igd		16	27395662	0.0229	9.99494e-09	finn-b-E4_HYTHYNAS	Hypothyroidism, other/unspecified || id:finn-b-E4_HYTHYNAS	TRUE	reported	igd	2	TRUE
rs2110451	A	G	A	G	0.0838	-0.0937	0.2776	0.2776	FALSE	FALSE	FALSE	finn-b-J10_ARDS	12	9931347	0.1227		0.4452	Adult respiratory distress syndrome || id:finn-b-J10_ARDS	Adult respiratory distress syndrome	Adult respiratory distress syndrome || ||	TRUE	igd		12	9931347	0.012	2.9451e-12	finn-b-E4_HYTHYNAS	Hypothyroidism, other/unspecified || id:finn-b-E4_HYTHYNAS	TRUE	reported	igd	2	TRUE
rs244689	G	A	G	A	-0.0767	0.0561	0.7489	0.749	FALSE	FALSE	FALSE	finn-b-J10_ARDS	5	133422816	0.1276		0.66	Adult respiratory distress syndrome || id:finn-b-J10_ARDS	Adult respiratory distress syndrome	Adult respiratory distress syndrome || ||	TRUE	igd		5	133422816	0.0124	5.99902e-10	finn-b-E4_HYTHYNAS	Hypothyroidism, other/unspecified || id:finn-b-E4_HYTHYNAS	TRUE	reported	igd	2	TRUE
rs2456447	G	C	G	C	-0.0726	0.0366	0.3625	0.3626	FALSE	TRUE	FALSE	finn-b-J10_ARDS	8	128188198	0.1153		0.750699	Adult respiratory distress syndrome || id:finn-b-J10_ARDS	Adult respiratory distress syndrome	Adult respiratory distress syndrome || ||	TRUE	igd		8	128188198	0.0112	1.11699e-10	finn-b-E4_HYTHYNAS	Hypothyroidism, other/unspecified || id:finn-b-E4_HYTHYNAS	TRUE	reported	igd	2	TRUE
rs2928167	G	A	G	A	-0.0877	-0.0525	0.1994	0.1997	FALSE	FALSE	FALSE	finn-b-J10_ARDS	5	76477820	0.1377		0.702999	Adult respiratory distress syndrome || id:finn-b-J10_ARDS	Adult respiratory distress syndrome	Adult respiratory distress syndrome || ||	TRUE	igd		5	76477820	0.0135	8.93717e-11	finn-b-E4_HYTHYNAS	Hypothyroidism, other/unspecified || id:finn-b-E4_HYTHYNAS	TRUE	reported	igd	2	TRUE
rs2983511	C	G	C	G	-0.0901	0.0405	0.2627	0.2629	FALSE	TRUE	FALSE	finn-b-J10_ARDS	6	166043959	0.125		0.7461	Adult respiratory distress syndrome || id:finn-b-J10_ARDS	Adult respiratory distress syndrome	Adult respiratory distress syndrome || ||	TRUE	igd		6	166043959	0.0122	1.64589e-13	finn-b-E4_HYTHYNAS	Hypothyroidism, other/unspecified || id:finn-b-E4_HYTHYNAS	TRUE	reported	igd	2	TRUE
rs3132487	T	G	T	G	0.1701	0.1677	0.1866	0.1868	FALSE	FALSE	FALSE	finn-b-J10_ARDS	6	31243008	0.1481		0.2573	Adult respiratory distress syndrome || id:finn-b-J10_ARDS	Adult respiratory distress syndrome	Adult respiratory distress syndrome || ||	TRUE	igd		6	31243008	0.0146	3.25987e-31	finn-b-E4_HYTHYNAS	Hypothyroidism, other/unspecified || id:finn-b-E4_HYTHYNAS	TRUE	reported	igd	2	TRUE
rs3132487	T	G	T	C	0.1701	-0.0555	0.1866	0.2161	TRUE	FALSE	FALSE	finn-b-J10_ARDS	6	31243008	0.1451		0.702301	Adult respiratory distress syndrome || id:finn-b-J10_ARDS	Adult respiratory distress syndrome	Adult respiratory distress syndrome || ||	TRUE	igd		6	31243008	0.0146	3.25987e-31	finn-b-E4_HYTHYNAS	Hypothyroidism, other/unspecified || id:finn-b-E4_HYTHYNAS	TRUE	reported	igd	2	FALSE
rs41294854	T	C	T	C	0.092	0.2999	0.1232	0.1232	FALSE	FALSE	FALSE	finn-b-J10_ARDS	6	135401371	0.1686		0.0752506	Adult respiratory distress syndrome || id:finn-b-J10_ARDS	Adult respiratory distress syndrome	Adult respiratory distress syndrome || ||	TRUE	igd		6	135401371	0.0163	1.62002e-08	finn-b-E4_HYTHYNAS	Hypothyroidism, other/unspecified || id:finn-b-E4_HYTHYNAS	TRUE	reported	igd	2	TRUE
rs4409785	C	T	C	T	0.0891	0.0212	0.1669	0.1668	FALSE	FALSE	FALSE	finn-b-J10_ARDS	11	95311422	0.1476		0.8856	Adult respiratory distress syndrome || id:finn-b-J10_ARDS	Adult respiratory distress syndrome	Adult respiratory distress syndrome || ||	TRUE	igd		11	95311422	0.0144	5.96403e-10	finn-b-E4_HYTHYNAS	Hypothyroidism, other/unspecified || id:finn-b-E4_HYTHYNAS	TRUE	reported	igd	2	TRUE
rs4853458	G	A	G	A	-0.1144	-0.2329	0.7687	0.769	FALSE	FALSE	FALSE	finn-b-J10_ARDS	2	191959489	0.1303		0.0738992	Adult respiratory distress syndrome || id:finn-b-J10_ARDS	Adult respiratory distress syndrome	Adult respiratory distress syndrome || ||	TRUE	igd		2	191959489	0.0127	2.84577e-19	finn-b-E4_HYTHYNAS	Hypothyroidism, other/unspecified || id:finn-b-E4_HYTHYNAS	TRUE	reported	igd	2	TRUE
rs5845323	GC	G	GC	G	0.086	-0.0729	0.399	0.3987	FALSE	FALSE	FALSE	finn-b-J10_ARDS	22	37583732	0.1127		0.5179	Adult respiratory distress syndrome || id:finn-b-J10_ARDS	Adult respiratory distress syndrome	Adult respiratory distress syndrome || ||	TRUE	igd		22	37583732	0.011	4.58881e-15	finn-b-E4_HYTHYNAS	Hypothyroidism, other/unspecified || id:finn-b-E4_HYTHYNAS	TRUE	reported	igd	2	TRUE
rs61759532	T	C	T	C	0.0751	-0.0905	0.1896	0.1898	FALSE	FALSE	FALSE	finn-b-J10_ARDS	17	7240391	0.1421		0.5242	Adult respiratory distress syndrome || id:finn-b-J10_ARDS	Adult respiratory distress syndrome	Adult respiratory distress syndrome || ||	TRUE	igd		17	7240391	0.0138	4.83203e-08	finn-b-E4_HYTHYNAS	Hypothyroidism, other/unspecified || id:finn-b-E4_HYTHYNAS	TRUE	reported	igd	2	TRUE
rs62073975	A	G	A	G	-0.1249	-0.0669	0.06624	0.06618	FALSE	FALSE	FALSE	finn-b-J10_ARDS	17	45622690	0.2209		0.7621	Adult respiratory distress syndrome || id:finn-b-J10_ARDS	Adult respiratory distress syndrome	Adult respiratory distress syndrome || ||	TRUE	igd		17	45622690	0.0218	1.07999e-08	finn-b-E4_HYTHYNAS	Hypothyroidism, other/unspecified || id:finn-b-E4_HYTHYNAS	TRUE	reported	igd	2	TRUE
rs6679677	A	C	A	C	0.3161	0.1137	0.1472	0.1472	FALSE	FALSE	FALSE	finn-b-J10_ARDS	1	114303808	0.1562		0.4668	Adult respiratory distress syndrome || id:finn-b-J10_ARDS	Adult respiratory distress syndrome	Adult respiratory distress syndrome || ||	TRUE	igd		1	114303808	0.0153	1.15798e-94	finn-b-E4_HYTHYNAS	Hypothyroidism, other/unspecified || id:finn-b-E4_HYTHYNAS	TRUE	reported	igd	2	TRUE
rs7043516	C	A	C	A	-0.0969	-0.0996	0.1682	0.1679	FALSE	FALSE	FALSE	finn-b-J10_ARDS	9	100617433	0.1485		0.5025	Adult respiratory distress syndrome || id:finn-b-J10_ARDS	Adult respiratory distress syndrome	Adult respiratory distress syndrome || ||	TRUE	igd		9	100617433	0.0145	2.42996e-11	finn-b-E4_HYTHYNAS	Hypothyroidism, other/unspecified || id:finn-b-E4_HYTHYNAS	TRUE	reported	igd	2	TRUE
rs707937	G	C	G	C	-0.1114	-0.2072	0.1983	0.1983	FALSE	TRUE	FALSE	finn-b-J10_ARDS	6	31731014	0.1391		0.1363	Adult respiratory distress syndrome || id:finn-b-J10_ARDS	Adult respiratory distress syndrome	Adult respiratory distress syndrome || ||	TRUE	igd		6	31731014	0.0136	2.64911e-16	finn-b-E4_HYTHYNAS	Hypothyroidism, other/unspecified || id:finn-b-E4_HYTHYNAS	TRUE	reported	igd	2	TRUE
rs7148630	T	C	T	C	-0.1032	-0.1266	0.8923	0.8923	FALSE	FALSE	FALSE	finn-b-J10_ARDS	14	81484459	0.178		0.4768	Adult respiratory distress syndrome || id:finn-b-J10_ARDS	Adult respiratory distress syndrome	Adult respiratory distress syndrome || ||	TRUE	igd		14	81484459	0.0174	2.98003e-09	finn-b-E4_HYTHYNAS	Hypothyroidism, other/unspecified || id:finn-b-E4_HYTHYNAS	TRUE	reported	igd	2	TRUE
rs7310615	G	C	G	C	-0.1406	0.0882	0.5861	0.5865	FALSE	TRUE	FALSE	finn-b-J10_ARDS	12	111865049	0.1118		0.4301	Adult respiratory distress syndrome || id:finn-b-J10_ARDS	Adult respiratory distress syndrome	Adult respiratory distress syndrome || ||	TRUE	igd		12	111865049	0.0109	5.91562e-38	finn-b-E4_HYTHYNAS	Hypothyroidism, other/unspecified || id:finn-b-E4_HYTHYNAS	TRUE	reported	igd	2	TRUE
rs73192661	T	C	T	C	-0.1041	-0.0556	0.3839	0.3836	FALSE	FALSE	FALSE	finn-b-J10_ARDS	3	188128794	0.1137		0.6248	Adult respiratory distress syndrome || id:finn-b-J10_ARDS	Adult respiratory distress syndrome	Adult respiratory distress syndrome || ||	TRUE	igd		3	188128794	0.0111	6.44911e-21	finn-b-E4_HYTHYNAS	Hypothyroidism, other/unspecified || id:finn-b-E4_HYTHYNAS	TRUE	reported	igd	2	TRUE
rs7320607	A	G	A	G	0.0883	0.0685	0.2949	0.2945	FALSE	FALSE	FALSE	finn-b-J10_ARDS	13	24785637	0.1213		0.5723	Adult respiratory distress syndrome || id:finn-b-J10_ARDS	Adult respiratory distress syndrome	Adult respiratory distress syndrome || ||	TRUE	igd		13	24785637	0.0118	6.94544e-14	finn-b-E4_HYTHYNAS	Hypothyroidism, other/unspecified || id:finn-b-E4_HYTHYNAS	TRUE	reported	igd	2	TRUE
rs76169968	A	G	A	G	-0.1048	-0.188	0.09834	0.09837	FALSE	FALSE	FALSE	finn-b-J10_ARDS	11	117082966	0.1836		0.306	Adult respiratory distress syndrome || id:finn-b-J10_ARDS	Adult respiratory distress syndrome	Adult respiratory distress syndrome || ||	TRUE	igd		11	117082966	0.0182	8.44403e-09	finn-b-E4_HYTHYNAS	Hypothyroidism, other/unspecified || id:finn-b-E4_HYTHYNAS	TRUE	reported	igd	2	TRUE
rs7850258	G	A	G	A	0.2327	0.0728	0.653	0.6536	FALSE	FALSE	FALSE	finn-b-J10_ARDS	9	100549013	0.1158		0.5299	Adult respiratory distress syndrome || id:finn-b-J10_ARDS	Adult respiratory distress syndrome	Adult respiratory distress syndrome || ||	TRUE	igd		9	100549013	0.0114	5.7544e-93	finn-b-E4_HYTHYNAS	Hypothyroidism, other/unspecified || id:finn-b-E4_HYTHYNAS	TRUE	reported	igd	2	TRUE
rs7853472	A	G	A	G	0.0964	0.1831	0.3964	0.3962	FALSE	FALSE	FALSE	finn-b-J10_ARDS	9	127036667	0.1129		0.1048	Adult respiratory distress syndrome || id:finn-b-J10_ARDS	Adult respiratory distress syndrome	Adult respiratory distress syndrome || ||	TRUE	igd		9	127036667	0.011	2.14487e-18	finn-b-E4_HYTHYNAS	Hypothyroidism, other/unspecified || id:finn-b-E4_HYTHYNAS	TRUE	reported	igd	2	TRUE
rs78765971	G	GAC	G	GAC	0.2127	-0.0801	0.1142	0.1141	FALSE	FALSE	FALSE	finn-b-J10_ARDS	1	108362169	0.1734		0.6442	Adult respiratory distress syndrome || id:finn-b-J10_ARDS	Adult respiratory distress syndrome	Adult respiratory distress syndrome || ||	TRUE	igd		1	108362169	0.0171	1.08993e-35	finn-b-E4_HYTHYNAS	Hypothyroidism, other/unspecified || id:finn-b-E4_HYTHYNAS	TRUE	reported	igd	2	TRUE
rs7902146	T	C	T	C	-0.0776	-0.1521	0.7503	0.7503	FALSE	FALSE	FALSE	finn-b-J10_ARDS	10	63801030	0.1273		0.2324	Adult respiratory distress syndrome || id:finn-b-J10_ARDS	Adult respiratory distress syndrome	Adult respiratory distress syndrome || ||	TRUE	igd		10	63801030	0.0124	4.14601e-10	finn-b-E4_HYTHYNAS	Hypothyroidism, other/unspecified || id:finn-b-E4_HYTHYNAS	TRUE	reported	igd	2	TRUE
rs794999	G	A	G	A	-0.0743	0.1474	0.7722	0.7725	FALSE	FALSE	FALSE	finn-b-J10_ARDS	3	12229015	0.1321		0.2644	Adult respiratory distress syndrome || id:finn-b-J10_ARDS	Adult respiratory distress syndrome	Adult respiratory distress syndrome || ||	TRUE	igd		3	12229015	0.0128	6.42999e-09	finn-b-E4_HYTHYNAS	Hypothyroidism, other/unspecified || id:finn-b-E4_HYTHYNAS	TRUE	reported	igd	2	TRUE
rs877636	A	G	A	G	-0.0738	0.0699	0.6937	0.6936	FALSE	FALSE	FALSE	finn-b-J10_ARDS	12	56480583	0.12		0.5602	Adult respiratory distress syndrome || id:finn-b-J10_ARDS	Adult respiratory distress syndrome	Adult respiratory distress syndrome || ||	TRUE	igd		12	56480583	0.0117	2.63003e-10	finn-b-E4_HYTHYNAS	Hypothyroidism, other/unspecified || id:finn-b-E4_HYTHYNAS	TRUE	reported	igd	2	TRUE
rs881858	A	G	A	G	0.1008	0.0321	0.6802	0.6798	FALSE	FALSE	FALSE	finn-b-J10_ARDS	6	43806609	0.1192		0.7878	Adult respiratory distress syndrome || id:finn-b-J10_ARDS	Adult respiratory distress syndrome	Adult respiratory distress syndrome || ||	TRUE	igd		6	43806609	0.0116	5.00956e-18	finn-b-E4_HYTHYNAS	Hypothyroidism, other/unspecified || id:finn-b-E4_HYTHYNAS	TRUE	reported	igd	2	TRUE
rs9273400	T	C	T	C	0.2112	0.1408	0.429	0.4289	FALSE	FALSE	FALSE	finn-b-J10_ARDS	6	32627128	0.1173		0.2301	Adult respiratory distress syndrome || id:finn-b-J10_ARDS	Adult respiratory distress syndrome	Adult respiratory distress syndrome || ||	TRUE	igd		6	32627128	0.0116	3.54568e-74	finn-b-E4_HYTHYNAS	Hypothyroidism, other/unspecified || id:finn-b-E4_HYTHYNAS	TRUE	reported	igd	2	TRUE
rs9277542	C	T	C	T	-0.1092	0.0172	0.255	0.2554	FALSE	FALSE	FALSE	finn-b-J10_ARDS	6	33055247	0.1293		0.8944	Adult respiratory distress syndrome || id:finn-b-J10_ARDS	Adult respiratory distress syndrome	Adult respiratory distress syndrome || ||	TRUE	igd		6	33055247	0.0128	1.22687e-17	finn-b-E4_HYTHYNAS	Hypothyroidism, other/unspecified || id:finn-b-E4_HYTHYNAS	TRUE	reported	igd	2	TRUE
rs932036	T	A	T	A	0.0715	0.1757	0.2829	0.2826	FALSE	TRUE	FALSE	finn-b-J10_ARDS	4	26090862	0.1224		0.1513	Adult respiratory distress syndrome || id:finn-b-J10_ARDS	Adult respiratory distress syndrome	Adult respiratory distress syndrome || ||	TRUE	igd		4	26090862	0.0119	1.98002e-09	finn-b-E4_HYTHYNAS	Hypothyroidism, other/unspecified || id:finn-b-E4_HYTHYNAS	TRUE	reported	igd	2	TRUE
