# Supplementary material for: Genetic effect of thyroid function-related diseases on acute respiratory distress syndrome: a Mendelian randomization study
Source: Aging (Albany NY). 2024 Jul 1;16(17):12209–24. doi: 10.18632/aging.205996 (PMC11424573; doi:10.18632/aging.205996)
Supplement: Supplementary Table 2 [file aging-16-205996-s002.xls]

Supplementary Table 2. Totally 40 and 50 SNPs of DTG and hypothyroidism were acquired as IVs for UVMR analysis.
Pvalue	SNP	SNPChr	SNPPos	AssessedAllele	OtherAllele	Zscore	Gene	GeneSymbol	GeneChr	GenePos	NrCohorts	NrSamples	FDR	BonferroniP
3.27170000000001e-310	rs12195728	6	109278873	G	A	48.3598	ENSG00000080546	SESN1	6	109361831	37	31684	0	4.17E-302
3.27170000000001e-310	rs61759532	17	7240391	T	C	-45.0731	ENSG00000072818	ACAP1	17	7247322	16	14263	0	4.17E-302
3.27170000000001e-310	rs2271194	12	56477694	A	T	-39.7811	ENSG00000139531	SUOX	12	56395694	35	31239	0	4.17E-302
3.27170000000001e-310	rs2271194	12	56477694	A	T	39.1789	ENSG00000197728	RPS26	12	56436876	33	26124	0	4.17E-302
4.08E-198	rs2110451	12	9931347	A	G	30.0293	ENSG00000184293	CLECL1	12	9877175	36	31568	0	5.20E-190
2.49E-140	rs61759532	17	7240391	T	C	25.2189	ENSG00000213859	KCTD11	17	7256733	35	27070	0	3.17E-132
3.06E-90	rs2858483	22	37586672	C	A	20.1437	ENSG00000128340	RAC2	22	37630894	35	27283	0	3.90E-82
1.16E-89	rs2271194	12	56477694	A	T	-20.0774	ENSG00000065361	ERBB3	12	56485465	35	31239	0	1.48E-81
2.60E-77	rs10116520	9	127029630	G	A	18.6115	ENSG00000119408	NEK6	9	127067735	36	31567	0	3.31E-69
1.13E-75	rs2110451	12	9931347	A	G	-18.4081	ENSG00000172322	CLEC12A	12	10126104	34	30605	0	1.44E-67
3.46E-70	rs7310615	12	111865049	C	G	17.7109	ENSG00000111252	SH2B3	12	111866589	34	28410	0	4.41E-62
5.37E-62	rs4409785	11	95311422	C	T	-16.6154	ENSG00000149212	SESN3	11	94932204	37	31684	0	6.84E-54
5.49E-61	rs2110451	12	9931347	A	G	16.4757	ENSG00000110848	CD69	12	9909289	35	31354	0	7.00E-53
8.26E-59	rs11571297	2	204745003	T	C	-16.1695	ENSG00000163599	CTLA4	2	204735596	36	31562	0	1.05E-50
5.13E-51	rs7028661	9	100538470	A	G	-15.0237	ENSG00000136932	C9orf156	9	100675811	36	31568	0	6.53E-43
2.01E-50	rs62073975	17	45622690	A	G	14.933	ENSG00000198933	TBKBP1	17	45780431	20	20903	0	2.56E-42
3.52E-50	rs6679677	1	114303808	A	C	14.8957	ENSG00000134242	PTPN22	1	114385407	32	29560	0	4.48E-42
5.66E-50	rs2110451	12	9931347	A	G	-14.8638	ENSG00000256660	CLEC12B	12	10167222	36	31568	0	7.21E-42
4.14E-49	rs2110451	12	9931347	A	G	14.7301	ENSG00000213443	RP11-75L1.2	12	9848401	13	5501	0	5.27E-41
7.36E-47	rs2110451	12	9931347	A	G	-14.3756	ENSG00000256582	RP11-75L1.1	12	9859309	13	5501	0	9.38E-39
2.05E-46	rs7043516	9	100617433	C	A	-14.3044	ENSG00000136932	C9orf156	9	100675811	37	31684	0	2.62E-38
3.47E-45	rs9687206	5	76515824	G	A	14.1066	ENSG00000164253	WDR41	5	76819115	36	26609	0	4.42E-37
2.50E-39	rs2110451	12	9931347	A	G	-13.1207	ENSG00000069493	CLEC2D	12	9828841	34	31469	0	3.19E-31
2.00E-38	rs61759532	17	7240391	T	C	12.9622	ENSG00000239697	TNFSF12	17	7458566	35	27070	0	2.55E-30
3.79E-38	rs7310615	12	111865049	C	G	-12.9131	ENSG00000234608	MAPKAPK5-AS1	12	112279138	32	22416	0	4.83E-30
6.57E-37	rs7028661	9	100538470	A	G	12.692	ENSG00000106789	CORO2A	9	100919089	36	31568	0	8.36E-29
3.41E-35	rs7148630	14	81484459	C	T	-12.3784	ENSG00000100629	CEP128	14	81184595	34	25299	0	4.35E-27
2.57E-32	rs244686	5	133423794	T	C	-11.8351	ENSG00000119048	UBE2B	5	133717276	15	13925	0	3.27E-24
3.95E-29	rs2858483	22	37586672	C	A	11.203	ENSG00000133466	C1QTNF6	22	37585816	35	27283	0	5.03E-21
5.87E-28	rs7310615	12	111865049	C	G	-10.9612	ENSG00000111275	ALDH2	12	112226236	34	28410	0	7.48E-20
6.88E-28	rs7310615	12	111865049	C	G	10.9468	ENSG00000111231	GPN3	12	110898654	25	22922	0	8.77E-20
6.88E-28	rs2110451	12	9931347	A	G	-10.9467	ENSG00000225231	AC091814.2	12	10092636	20	10735	0	8.77E-20
1.12E-21	rs2858483	22	37586672	C	A	-9.5648	ENSG00000226233	RP1-151B14.9	22	37611854	10	4022	0	1.43E-13
3.04E-21	rs2271194	12	56477694	A	T	9.4614	ENSG00000139613	SMARCC2	12	56570059	35	31239	0	3.88E-13
5.06E-21	rs2110451	12	9931347	A	G	-9.4078	ENSG00000214826	DDX12P	12	9585567	13	5501	0	6.44E-13
2.22E-20	rs7310615	12	111865049	C	G	-9.2511	ENSG00000198324	FAM109A	12	111802632	34	28410	0	2.83E-12
4.60E-20	rs7902146	10	63801030	C	T	-9.1729	ENSG00000182010	RTKN2	10	63985630	36	31644	0	5.86E-12
7.55E-20	rs7310615	12	111865049	C	G	-9.1192	ENSG00000198270	TMEM116	12	112410027	32	27447	0	9.62E-12
1.08E-19	rs6679677	1	114303808	A	C	-9.0801	ENSG00000118655	DCLRE1B	1	114452235	33	29600	0	1.38E-11
3.93E-19	rs62073975	17	45622690	A	G	-8.9389	ENSG00000173917	HOXB2	17	46620848	21	21652	0	5.00E-11
7.49E-19	rs2271194	12	56477694	A	T	-8.8674	ENSG00000196465	MYL6B	12	56548905	16	14262	0	9.53E-11
9.30E-19	rs61759532	17	7240391	T	C	8.8433	ENSG00000161944	ASGR2	17	7011830	35	27070	0	1.18E-10
6.03E-18	rs6679677	1	114303808	A	C	-8.6319	ENSG00000116793	PHTF1	1	114270782	33	29600	0	7.68E-10
6.06E-18	rs61759532	17	7240391	T	C	8.6316	ENSG00000072778	ACADVL	17	7124518	35	27070	0	7.72E-10
6.86E-18	rs73192661	3	188128794	T	C	-8.6172	ENSG00000113916	BCL6	3	187451340	36	31555	0	8.74E-10
8.43E-17	rs12348448	9	5525775	G	A	8.3251	ENSG00000197646	PDCD1LG2	9	5540913	12	10333	0	1.07E-08
2.05E-16	rs7310615	12	111865049	C	G	8.2195	ENSG00000135148	TRAFD1	12	112577356	34	28410	0	2.60E-08
1.70E-14	rs7310615	12	111865049	C	G	-7.6716	ENSG00000257877	RP3-462E2.3	12	112250910	12	5164	0	2.16E-06
9.10E-14	rs7028661	9	100538470	A	G	7.4534	ENSG00000106785	TRIM14	9	100856525	35	26493	0	1.16E-05
3.47E-13	rs2110451	12	9931347	A	G	-7.2745	ENSG00000165682	CLEC1B	12	10152132	36	31568	0	4.42E-05
3.74E-13	rs7028661	9	100538470	A	G	7.2649	ENSG00000136842	TMOD1	9	100313742	36	31568	0	4.76E-05
6.07E-13	rs2110451	12	9931347	A	G	-7.1987	ENSG00000111788	RP11-22B23.1	12	9448257	13	5501	0	7.74E-05
1.03E-11	rs2110451	12	9931347	A	G	-6.8015	ENSG00000214776	RP11-726G1.1	12	9674506	13	5501	0	0.001317478
1.12E-11	rs2271194	12	56477694	A	T	6.7901	ENSG00000170581	STAT2	12	56744660	35	31239	0	0.001427884
2.39E-11	rs7310615	12	111865049	C	G	-6.68	ENSG00000226469	ADAM1B	12	112365821	11	4656	0	0.003042705
6.98E-11	rs7902146	10	63801030	C	T	-6.5208	ENSG00000150347	ARID5B	10	63758881	36	26609	0	0.008893551
1.07E-10	rs7310615	12	111865049	C	G	-6.4573	ENSG00000204852	TCTN1	12	111069533	33	23335	0	0.013564448
1.90E-10	rs10223666	6	43805502	G	C	-6.3694	ENSG00000124587	PEX6	6	42939283	35	31226	0	0.024133818
2.82E-10	rs62073975	17	45622690	A	G	-6.3084	ENSG00000141295	SCRN2	17	45916878	3	6079	0	0.03585563
3.93E-10	rs61759532	17	7240391	T	C	-6.2566	ENSG00000132507	EIF5A	17	7213046	16	14263	0	0.050103904
4.05E-10	rs244686	5	133423794	T	C	-6.2519	ENSG00000081059	TCF7	5	133468979	33	30688	0	0.051602717
4.88E-10	rs2110451	12	9931347	A	G	-6.2226	ENSG00000256594	RP11-705C15.2	12	9799098	30	22494	0	0.06218864
1.17E-09	rs6679677	1	114303808	A	C	-6.0837	ENSG00000226167	AP4B1-AS1	1	114421558	12	4988	1.31E-05	0.149461068
1.18E-09	rs61759532	17	7240391	T	C	6.0829	ENSG00000187838	PLSCR3	17	7300231	34	26856	1.31E-05	0.150390663
1.27E-09	rs2271194	12	56477694	A	T	-6.0707	ENSG00000135414	GDF11	12	56143987	35	31239	1.31E-05	0.162067906
3.33E-09	rs7310615	12	111865049	C	G	-5.9146	ENSG00000111237	VPS29	12	110934412	34	28410	2.60E-05	0.423640694
3.43E-09	rs12195728	6	109278873	G	A	-5.9093	ENSG00000118690	ARMC2	6	109232402	36	31470	2.60E-05	0.437240798
1.96E-08	rs2271194	12	56477694	A	T	-5.6157	ENSG00000258311	RP11-644F5.10	12	56114153	32	27216	0.000102315	1
2.24E-08	rs4274624	2	191958656	C	T	5.5926	ENSG00000115419	GLS	2	191787915	35	31353	0.000108605	1
2.72E-08	rs6679677	1	114303808	A	C	-5.5585	ENSG00000134262	AP4B1	1	114442596	32	28851	0.000114767	1
2.79E-08	rs12195728	6	109278873	G	A	-5.5539	ENSG00000135535	CD164	6	109695739	36	26609	0.000121112	1
4.19E-08	rs11571297	2	204745003	T	C	5.4828	ENSG00000163600	ICOS	2	204813885	36	31562	0.0001397	1
5.64E-08	rs7310615	12	111865049	C	G	5.43	ENSG00000204856	FAM216A	12	110917179	31	22202	0.000215163	1
8.01E-08	rs7310615	12	111865049	C	G	-5.367	ENSG00000257595	RP3-473L9.4	12	111824100	11	4530	0.000296399	1
8.17E-08	rs4409785	11	95311422	C	T	-5.3633	ENSG00000245552	RP11-712B9.2	11	94925485	23	17261	0.000302648	1
8.81E-08	rs61759532	17	7240391	T	C	-5.3497	ENSG00000141504	SAT2	17	7530373	35	27070	0.000308778	1
1.04E-07	rs61759532	17	7240391	T	C	-5.319	ENSG00000170291	ELP5	17	7158997	33	21076	0.000327106	1
2.08E-07	rs10116520	9	127029630	G	A	5.1921	ENSG00000136933	RABEPK	9	127979629	36	31567	0.000630895	1
2.23E-07	rs2110451	12	9931347	A	G	-5.1791	ENSG00000188393	CLEC2A	12	10068126	29	28880	0.0006804	1
2.24E-07	rs62073975	17	45622690	A	G	5.1783	ENSG00000005243	COPZ2	17	46109462	21	21652	0.000680357	1
3.65E-07	rs12195728	6	109278873	G	A	-5.086	ENSG00000183137	CEP57L1	6	109450724	36	26609	0.001085204	1
3.77E-07	rs7310615	12	111865049	C	G	-5.0804	ENSG00000111300	NAA25	12	112505663	33	28370	0.001109665	1
1.53E-06	rs244686	5	133423794	T	C	-4.8067	ENSG00000164615	CAMLG	5	134081019	32	25787	0.004282577	1
1.70E-06	rs7310615	12	111865049	C	G	-4.7856	ENSG00000111271	ACAD10	12	112159380	34	28410	0.004687881	1
1.98E-06	rs2858483	22	37586672	C	A	4.7558	ENSG00000183473	SSTR3	22	37604320	32	26970	0.005392903	1
2.41E-06	rs12348448	9	5525775	G	A	4.7153	ENSG00000120217	CD274	9	5460534	29	26487	0.006547619	1
2.63E-06	rs4274624	2	191958656	C	T	-4.6973	ENSG00000198130	HIBCH	2	191131690	36	31567	0.006986476	1
4.43E-06	rs7310615	12	111865049	C	G	4.59	ENSG00000270018	RP3-462E2.5	12	112335425	13	5494	0.011805472	1
4.65E-06	rs10905668	10	6092055	T	C	4.58	ENSG00000057608	GDI2	10	5845640	16	14263	0.012496236	1
6.54E-06	rs1534430	2	12644736	T	C	-4.5078	ENSG00000071575	TRIB2	2	12869937	36	26609	0.017287872	1
7.63E-06	rs10905668	10	6092055	T	C	4.4753	ENSG00000134460	IL2RA	10	6078470	36	31644	0.020025121	1
8.54E-06	rs7310615	12	111865049	C	G	-4.4511	ENSG00000122986	HVCN1	12	111104200	33	27661	0.022228862	1
9.09E-06	rs12348448	9	5525775	G	A	4.4379	ENSG00000107020	PLGRKT	9	5397925	28	20707	0.023704942	1
9.34E-06	rs7310615	12	111865049	C	G	-4.432	ENSG00000196850	PPTC7	12	110995122	34	28410	0.024208266	1
1.25E-05	rs2271194	12	56477694	A	T	4.3695	ENSG00000092841	MYL6	12	56554612	35	31239	0.03217954	1
1.54E-05	rs10116520	9	127029630	G	A	4.3237	ENSG00000235204	RP11-121A14.2	9	127022482	9	3831	0.038952663	1
1.73E-05	rs7310615	12	111865049	C	G	-4.2972	ENSG00000173064	HECTD4	12	112708944	23	16928	0.043600189	1
SNPs associated with DTG and hypothyroidism for UVMR analysis
