# Supplementary material for: Genetic effect of thyroid function-related diseases on acute respiratory distress syndrome: a Mendelian randomization study
Source: Aging (Albany NY). 2024 Jul 1;16(17):12209–24. doi: 10.18632/aging.205996 (PMC11424573; doi:10.18632/aging.205996)
Supplement: Supplementary Table 3 [file aging-16-205996-s003.xls]

Supplementary Table 3. Enrichment analysis of 96 key genes 1 and 113 key genes 2 corresponding to SNPs associated with DTG and hypothyroidism.
Pvalue	SNP	SNPChr	SNPPos	AssessedAllele	OtherAllele	Zscore	Gene	GeneSymbol	GeneChr	GenePos	NrCohorts	NrSamples	FDR	BonferroniP
3.27170000000001e-310	rs11153158	6	109376118	C	T	51.3964	ENSG00000080546	SESN1	6	109361831	37	31679	0	4.17E-302
3.27170000000001e-310	rs61759532	17	7240391	T	C	-45.0731	ENSG00000072818	ACAP1	17	7247322	16	14263	0	4.17E-302
1.20E-295	rs877636	12	56480583	G	A	-36.7492	ENSG00000139531	SUOX	12	56395694	36	31355	0	1.52E-287
4.08E-198	rs2110451	12	9931347	A	G	30.0293	ENSG00000184293	CLECL1	12	9877175	36	31568	0	5.20E-190
1.26E-146	rs877636	12	56480583	G	A	25.7865	ENSG00000197728	RPS26	12	56436876	34	26240	0	1.60E-138
2.49E-140	rs61759532	17	7240391	T	C	25.2189	ENSG00000213859	KCTD11	17	7256733	35	27070	0	3.17E-132
4.66E-128	rs10425559	19	4837487	A	G	24.0744	ENSG00000127666	TICAM1	19	4823830	35	31238	0	5.93E-120
8.81E-103	rs794999	3	12229015	A	G	-21.5263	ENSG00000157152	SYN2	3	12139388	36	31598	0	1.12E-94
5.06E-93	rs76169968	11	117082966	A	G	20.4585	ENSG00000149577	SIDT2	11	117058804	36	31355	0	6.44E-85
1.56E-87	rs76169968	11	117082966	A	G	19.8325	ENSG00000160613	PCSK7	11	117089147	36	31355	0	1.99E-79
5.33E-77	rs877636	12	56480583	G	A	-18.5728	ENSG00000065361	ERBB3	12	56485465	36	31355	0	6.79E-69
8.53E-77	rs7853472	9	127036667	A	G	18.5476	ENSG00000119408	NEK6	9	127067735	36	31566	0	1.09E-68
1.13E-75	rs2110451	12	9931347	A	G	-18.4081	ENSG00000172322	CLEC12A	12	10126104	34	30605	0	1.44E-67
1.90E-72	rs12922725	16	85671713	A	G	18.0015	ENSG00000131153	GINS2	16	85716741	28	21568	0	2.42E-64
3.46E-70	rs7310615	12	111865049	C	G	17.7109	ENSG00000111252	SH2B3	12	111866589	34	28410	0	4.41E-62
6.74E-63	rs1993945	5	76518195	T	A	16.7396	ENSG00000164253	WDR41	5	76819115	35	26493	0	8.59E-55
5.37E-62	rs4409785	11	95311422	C	T	-16.6154	ENSG00000149212	SESN3	11	94932204	37	31684	0	6.84E-54
5.49E-61	rs2110451	12	9931347	A	G	16.4757	ENSG00000110848	CD69	12	9909289	35	31354	0	7.00E-53
8.26E-59	rs11571297	2	204745003	T	C	-16.1695	ENSG00000163599	CTLA4	2	204735596	36	31562	0	1.05E-50
1.84E-50	rs7850258	9	100549013	A	G	-14.9388	ENSG00000136932	C9orf156	9	100675811	37	31684	0	2.35E-42
2.01E-50	rs62073975	17	45622690	A	G	14.933	ENSG00000198933	TBKBP1	17	45780431	20	20903	0	2.56E-42
3.52E-50	rs6679677	1	114303808	A	C	14.8957	ENSG00000134242	PTPN22	1	114385407	32	29560	0	4.48E-42
5.66E-50	rs2110451	12	9931347	A	G	-14.8638	ENSG00000256660	CLEC12B	12	10167222	36	31568	0	7.21E-42
4.14E-49	rs2110451	12	9931347	A	G	14.7301	ENSG00000213443	RP11-75L1.2	12	9848401	13	5501	0	5.27E-41
7.36E-47	rs2110451	12	9931347	A	G	-14.3756	ENSG00000256582	RP11-75L1.1	12	9859309	13	5501	0	9.38E-39
2.05E-46	rs7043516	9	100617433	C	A	-14.3044	ENSG00000136932	C9orf156	9	100675811	37	31684	0	2.62E-38
4.67E-46	rs7754251	6	90989125	G	C	14.2472	ENSG00000112182	BACH2	6	90821437	35	31349	0	5.94E-38
2.50E-39	rs2110451	12	9931347	A	G	-13.1207	ENSG00000069493	CLEC2D	12	9828841	34	31469	0	3.19E-31
2.00E-38	rs61759532	17	7240391	T	C	12.9622	ENSG00000239697	TNFSF12	17	7458566	35	27070	0	2.55E-30
3.79E-38	rs7310615	12	111865049	C	G	-12.9131	ENSG00000234608	MAPKAPK5-AS1	12	112279138	32	22416	0	4.83E-30
7.29E-38	rs12089835	1	19771438	T	C	-12.8627	ENSG00000040487	PQLC2	1	19647307	35	31354	0	9.28E-30
1.51E-36	rs7850258	9	100549013	A	G	12.6263	ENSG00000106789	CORO2A	9	100919089	37	31684	0	1.93E-28
2.26E-35	rs76169968	11	117082966	A	G	-12.4116	ENSG00000149591	TAGLN	11	117072767	36	31355	0	2.88E-27
3.41E-35	rs7148630	14	81484459	C	T	-12.3784	ENSG00000100629	CEP128	14	81184595	34	25299	0	4.35E-27
1.44E-33	rs76169968	11	117082966	A	G	-12.0747	ENSG00000160584	SIK3	11	116841635	36	31355	0	1.83E-25
6.96E-33	rs244689	5	133422816	A	G	-11.944	ENSG00000119048	UBE2B	5	133717276	16	14263	0	8.87E-25
5.87E-28	rs7310615	12	111865049	C	G	-10.9612	ENSG00000111275	ALDH2	12	112226236	34	28410	0	7.48E-20
6.88E-28	rs7310615	12	111865049	C	G	10.9468	ENSG00000111231	GPN3	12	110898654	25	22922	0	8.77E-20
6.88E-28	rs2110451	12	9931347	A	G	-10.9467	ENSG00000225231	AC091814.2	12	10092636	20	10735	0	8.77E-20
1.30E-27	rs3775291	4	187004074	T	C	10.8893	ENSG00000145476	CYP4V2	4	187123642	35	31086	0	1.65E-19
3.56E-23	rs11662485	18	77276417	A	G	9.9157	ENSG00000131196	NFATC1	18	77222590	33	26729	0	4.53E-15
1.55E-22	rs76169968	11	117082966	A	G	-9.7676	ENSG00000254851	RP11-109L13.1	11	117007771	13	5502	0	1.97E-14
1.19E-21	rs794999	3	12229015	A	G	-9.5592	ENSG00000132170	PPARG	3	12402361	36	31598	0	1.51E-13
5.06E-21	rs2110451	12	9931347	A	G	-9.4078	ENSG00000214826	DDX12P	12	9585567	13	5501	0	6.44E-13
2.22E-20	rs7310615	12	111865049	C	G	-9.2511	ENSG00000198324	FAM109A	12	111802632	34	28410	0	2.83E-12
4.60E-20	rs7902146	10	63801030	C	T	-9.1729	ENSG00000182010	RTKN2	10	63985630	36	31644	0	5.86E-12
7.55E-20	rs7310615	12	111865049	C	G	-9.1192	ENSG00000198270	TMEM116	12	112410027	32	27447	0	9.62E-12
1.08E-19	rs6679677	1	114303808	A	C	-9.0801	ENSG00000118655	DCLRE1B	1	114452235	33	29600	0	1.38E-11
3.93E-19	rs62073975	17	45622690	A	G	-8.9389	ENSG00000173917	HOXB2	17	46620848	21	21652	0	5.00E-11
9.30E-19	rs61759532	17	7240391	T	C	8.8433	ENSG00000161944	ASGR2	17	7011830	35	27070	0	1.18E-10
4.06E-18	rs41294854	6	135401371	T	C	-8.6768	ENSG00000118514	ALDH8A1	6	135254894	34	30775	0	5.17E-10
6.03E-18	rs6679677	1	114303808	A	C	-8.6319	ENSG00000116793	PHTF1	1	114270782	33	29600	0	7.68E-10
6.06E-18	rs61759532	17	7240391	T	C	8.6316	ENSG00000072778	ACADVL	17	7124518	35	27070	0	7.72E-10
6.86E-18	rs73192661	3	188128794	T	C	-8.6172	ENSG00000113916	BCL6	3	187451340	36	31555	0	8.74E-10
1.40E-16	rs3775291	4	187004074	T	C	8.2647	ENSG00000164344	KLKB1	4	187154879	36	31300	0	1.78E-08
2.05E-16	rs7310615	12	111865049	C	G	8.2195	ENSG00000135148	TRAFD1	12	112577356	34	28410	0	2.60E-08
1.51E-15	rs877636	12	56480583	G	A	-7.9757	ENSG00000196465	MYL6B	12	56548905	16	14263	0	1.93E-07
1.70E-14	rs7310615	12	111865049	C	G	-7.6716	ENSG00000257877	RP3-462E2.3	12	112250910	12	5164	0	2.16E-06
3.73E-14	rs877636	12	56480583	G	A	-7.5701	ENSG00000135414	GDF11	12	56143987	36	31355	0	4.75E-06
4.29E-14	rs2928167	5	76477820	G	A	-7.552	ENSG00000164251	F2RL1	5	76122949	16	14263	0	5.46E-06
1.54E-13	rs7850258	9	100549013	A	G	7.3837	ENSG00000106785	TRIM14	9	100856525	36	26609	0	1.96E-05
3.47E-13	rs2110451	12	9931347	A	G	-7.2745	ENSG00000165682	CLEC1B	12	10152132	36	31568	0	4.42E-05
6.07E-13	rs2110451	12	9931347	A	G	-7.1987	ENSG00000111788	RP11-22B23.1	12	9448257	13	5501	0	7.74E-05
1.08E-12	rs244689	5	133422816	A	G	-7.1203	ENSG00000081059	TCF7	5	133468979	36	31470	0	0.000137033
1.66E-12	rs7850258	9	100549013	A	G	7.0607	ENSG00000136842	TMOD1	9	100313742	37	31684	0	0.00021112
1.03E-11	rs2110451	12	9931347	A	G	-6.8015	ENSG00000214776	RP11-726G1.1	12	9674506	13	5501	0	0.001317478
2.39E-11	rs7310615	12	111865049	C	G	-6.68	ENSG00000226469	ADAM1B	12	112365821	11	4656	0	0.003042705
6.98E-11	rs7902146	10	63801030	C	T	-6.5208	ENSG00000150347	ARID5B	10	63758881	36	26609	0	0.008893551
7.70E-11	rs1683253	1	114638577	C	T	6.5065	ENSG00000118655	DCLRE1B	1	114452235	37	31684	0	0.00980188
1.07E-10	rs7310615	12	111865049	C	G	-6.4573	ENSG00000204852	TCTN1	12	111069533	33	23335	0	0.013564448
1.08E-10	rs11153158	6	109376118	C	T	-6.4551	ENSG00000118690	ARMC2	6	109232402	36	31465	0	0.013763102
1.18E-10	rs932036	4	26090862	T	A	6.4419	ENSG00000168214	RBPJ	4	26300809	36	31568	0	0.015033973
1.71E-10	rs881858	6	43806609	G	A	-6.3849	ENSG00000124587	PEX6	6	42939283	35	30960	0	0.021826384
2.82E-10	rs62073975	17	45622690	A	G	-6.3084	ENSG00000141295	SCRN2	17	45916878	3	6079	0	0.03585563
3.93E-10	rs61759532	17	7240391	T	C	-6.2566	ENSG00000132507	EIF5A	17	7213046	16	14263	0	0.050103904
4.47E-10	rs11153158	6	109376118	C	T	-6.2365	ENSG00000135535	CD164	6	109695739	36	26604	0	0.056944705
4.88E-10	rs2110451	12	9931347	A	G	-6.2226	ENSG00000256594	RP11-705C15.2	12	9799098	30	22494	0	0.06218864
7.96E-10	rs12089835	1	19771438	T	C	-6.1457	ENSG00000158747	NBL1	1	19975996	33	25895	1.32E-05	0.101314408
1.17E-09	rs6679677	1	114303808	A	C	-6.0837	ENSG00000226167	AP4B1-AS1	1	114421558	12	4988	1.31E-05	0.149461068
1.18E-09	rs61759532	17	7240391	T	C	6.0829	ENSG00000187838	PLSCR3	17	7300231	34	26856	1.31E-05	0.150390663
3.33E-09	rs7310615	12	111865049	C	G	-5.9146	ENSG00000111237	VPS29	12	110934412	34	28410	2.60E-05	0.423640694
4.20E-09	rs877636	12	56480583	G	A	5.876	ENSG00000258311	RP11-644F5.10	12	56114153	33	27331	3.24E-05	0.535217577
7.86E-09	rs1683253	1	114638577	C	T	5.7714	ENSG00000134242	PTPN22	1	114385407	36	31644	4.52E-05	1
1.01E-08	rs877636	12	56480583	G	A	5.7294	ENSG00000170581	STAT2	12	56744660	36	31355	5.80E-05	1
2.32E-08	rs4853458	2	191959489	A	G	5.5867	ENSG00000115419	GLS	2	191787915	35	31353	0.000114957	1
2.72E-08	rs6679677	1	114303808	A	C	-5.5585	ENSG00000134262	AP4B1	1	114442596	32	28851	0.000114767	1
4.19E-08	rs11571297	2	204745003	T	C	5.4828	ENSG00000163600	ICOS	2	204813885	36	31562	0.0001397	1
5.64E-08	rs7310615	12	111865049	C	G	5.43	ENSG00000204856	FAM216A	12	110917179	31	22202	0.000215163	1
6.20E-08	rs3775291	4	187004074	T	C	5.4129	ENSG00000109794	FAM149A	4	187059697	35	26225	0.000246648	1
8.01E-08	rs7310615	12	111865049	C	G	-5.367	ENSG00000257595	RP3-473L9.4	12	111824100	11	4530	0.000296399	1
8.17E-08	rs4409785	11	95311422	C	T	-5.3633	ENSG00000245552	RP11-712B9.2	11	94925485	23	17261	0.000302648	1
8.81E-08	rs61759532	17	7240391	T	C	-5.3497	ENSG00000141504	SAT2	17	7530373	35	27070	0.000308778	1
1.04E-07	rs61759532	17	7240391	T	C	-5.319	ENSG00000170291	ELP5	17	7158997	33	21076	0.000327106	1
1.13E-07	rs7853472	9	127036667	A	G	5.3051	ENSG00000136933	RABEPK	9	127979629	36	31566	0.000364528	1
1.66E-07	rs2928167	5	76477820	G	A	-5.2337	ENSG00000171643	S100Z	5	76181650	35	31315	0.000519855	1
1.68E-07	rs12089835	1	19771438	T	C	-5.2312	ENSG00000127463	EMC1	1	19560102	33	25360	0.000526118	1
2.23E-07	rs2110451	12	9931347	A	G	-5.1791	ENSG00000188393	CLEC2A	12	10068126	29	28880	0.0006804	1
2.24E-07	rs62073975	17	45622690	A	G	5.1783	ENSG00000005243	COPZ2	17	46109462	21	21652	0.000680357	1
2.29E-07	rs2928167	5	76477820	G	A	5.1743	ENSG00000132846	ZBED3	5	76375522	32	30927	0.00070506	1
3.46E-07	rs877636	12	56480583	G	A	-5.0963	ENSG00000076067	RBMS2	12	56950229	35	26280	0.001042054	1
3.77E-07	rs7310615	12	111865049	C	G	-5.0804	ENSG00000111300	NAA25	12	112505663	33	28370	0.001109665	1
3.80E-07	rs11153158	6	109376118	C	T	-5.0787	ENSG00000183137	CEP57L1	6	109450724	36	26604	0.001122063	1
5.24E-07	rs76169968	11	117082966	A	G	-5.0172	ENSG00000168092	PAFAH1B2	11	117031296	16	14263	0.0015874	1
7.72E-07	rs877636	12	56480583	G	A	-4.9422	ENSG00000123411	IKZF4	12	56416831	36	31355	0.002317575	1
1.70E-06	rs7310615	12	111865049	C	G	-4.7856	ENSG00000111271	ACAD10	12	112159380	34	28410	0.004687881	1
2.06E-06	rs4853458	2	191959489	A	G	-4.7476	ENSG00000198130	HIBCH	2	191131690	36	31567	0.005562995	1
3.35E-06	rs12922725	16	85671713	A	G	4.6482	ENSG00000154102	C16orf74	16	85754212	29	22317	0.008945204	1
4.43E-06	rs7310615	12	111865049	C	G	4.59	ENSG00000270018	RP3-462E2.5	12	112335425	13	5494	0.011805472	1
4.65E-06	rs10905668	10	6092055	T	C	4.58	ENSG00000057608	GDI2	10	5845640	16	14263	0.012496236	1
6.37E-06	rs244689	5	133422816	A	G	-4.5137	ENSG00000164615	CAMLG	5	134081019	35	26569	0.01691247	1
6.54E-06	rs1534430	2	12644736	T	C	-4.5078	ENSG00000071575	TRIB2	2	12869937	36	26609	0.017287872	1
7.63E-06	rs10905668	10	6092055	T	C	4.4753	ENSG00000134460	IL2RA	10	6078470	36	31644	0.020025121	1
8.54E-06	rs7310615	12	111865049	C	G	-4.4511	ENSG00000122986	HVCN1	12	111104200	33	27661	0.022228862	1
9.34E-06	rs7310615	12	111865049	C	G	-4.432	ENSG00000196850	PPTC7	12	110995122	34	28410	0.024208266	1
1.73E-05	rs7853472	9	127036667	A	G	4.2977	ENSG00000235204	RP11-121A14.2	9	127022482	9	3831	0.043543721	1
1.73E-05	rs7310615	12	111865049	C	G	-4.2972	ENSG00000173064	HECTD4	12	112708944	23	16928	0.043600189	1
Key genes related to DTG and hypothyroidism
